# Supplementary material
Source: HighWire-hosted journal article supplement (https://www.rsfjournal.org/highwire/filestream/3400/field_highwire_adjunct_files/0/Abraham_Online_Appendix.pdf)
Supplement: Abraham_Online_Appendix.pdf [file Abraham_Online_Appendix.pdf]

**Appendix Table 1a: Percent with Informal Work, Excluding Online Tasks, by Reason and Intensity of Use and Demographic Characteristics**

|                       | Any Informal Work in Past Month<br>(1) | Any Informal Work to Earn Money in Last Month<br>(2) | <i>Of which</i>                 |                           | Important Source of Household Income<br>(5) | Usually 10 Percent or More of Household Income<br>(6) | Usually Do 20 or More Hours per Month<br>(7) |
|-----------------------|----------------------------------------|------------------------------------------------------|---------------------------------|---------------------------|---------------------------------------------|-------------------------------------------------------|----------------------------------------------|
|                       |                                        |                                                      | Primary Source of Income<br>(3) | Supplements Income<br>(4) |                                             |                                                       |                                              |
| <b>ALL</b>            | 20.12                                  | 13.04                                                | 3.65                            | 9.39                      | 8.59                                        | 7.75                                                  | 5.69                                         |
| <b>Age (years)</b>    |                                        |                                                      |                                 |                           |                                             |                                                       |                                              |
| 18-24                 | 32.63                                  | 24.29                                                | 9.13                            | 15.16                     | 18.22                                       | 18.95                                                 | 7.93                                         |
| 25-34                 | 27.30                                  | 19.73                                                | 6.23                            | 13.50                     | 12.74                                       | 12.22                                                 | 8.98                                         |
| 35-44                 | 21.60                                  | 14.65                                                | 4.20                            | 10.45                     | 9.17                                        | 7.75                                                  | 6.20                                         |
| 45-54                 | 17.27                                  | 10.52                                                | 2.73                            | 7.78                      | 6.92                                        | 5.18                                                  | 4.26                                         |
| 55-64                 | 17.44                                  | 10.31                                                | 2.15                            | 8.16                      | 6.54                                        | 5.59                                                  | 4.96                                         |
| 65-74                 | 12.03                                  | 5.58                                                 | 0.65                            | 4.94                      | 3.77                                        | 3.15                                                  | 3.33                                         |
| 75 plus               | 9.95                                   | 3.60                                                 | 0.29                            | 3.31                      | 2.29                                        | 2.21                                                  | 1.81                                         |
| <b>Gender</b>         |                                        |                                                      |                                 |                           |                                             |                                                       |                                              |
| Male                  | 18.78                                  | 12.40                                                | 3.78                            | 8.62                      | 8.97                                        | 7.83                                                  | 5.79                                         |
| Female                | 21.38                                  | 13.64                                                | 3.52                            | 10.11                     | 8.22                                        | 7.67                                                  | 5.61                                         |
| <b>Race/ethnicity</b> |                                        |                                                      |                                 |                           |                                             |                                                       |                                              |
| White                 | 18.69                                  | 12.04                                                | 3.05                            | 9.00                      | 7.42                                        | 6.28                                                  | 5.09                                         |
| Black                 | 22.33                                  | 16.84                                                | 6.93                            | 9.92                      | 12.85                                       | 14.01                                                 | 9.03                                         |
| Hispanic              | 18.80                                  | 11.59                                                | 3.14                            | 8.45                      | 5.90                                        | 4.73                                                  | 3.25                                         |
| Multiracial           | 28.35                                  | 22.30                                                | 5.71                            | 16.59                     | 16.65                                       | 13.13                                                 | 12.36                                        |
| Other                 | 24.52                                  | 14.24                                                | 3.73                            | 10.51                     | 10.81                                       | 10.11                                                 | 6.23                                         |
| <b>Education</b>      |                                        |                                                      |                                 |                           |                                             |                                                       |                                              |
| High school or less   | 22.10                                  | 14.31                                                | 5.16                            | 9.15                      | 10.59                                       | 9.57                                                  | 6.12                                         |
| Some college          | 19.62                                  | 13.00                                                | 3.50                            | 9.51                      | 8.64                                        | 8.20                                                  | 6.13                                         |
| College plus          | 18.14                                  | 11.51                                                | 1.92                            | 9.60                      | 6.06                                        | 5.10                                                  | 4.78                                         |

Sources and Notes: Authors' calculations. Tabulations based on SHED data pooled for years 2016 and 2017 and weighted using GfK weights designed to make sample representative of the U.S. population 18 and over. N=18,560.

**Appendix Table 1b: Percent with Informal Work, Excluding Online Tasks, by Reason and Intensity of Use and Financial and Job Characteristics**

|                                                                            | Any Informal Work in Past Month | Any Informal Work to Earn Money in Last Month | Of which                 |                    | Important Source of Household Income | Usually 10 Percent or More of Household Income | Usually Do 20 or More Hours per Month |
|----------------------------------------------------------------------------|---------------------------------|-----------------------------------------------|--------------------------|--------------------|--------------------------------------|------------------------------------------------|---------------------------------------|
|                                                                            | (1)                             | (2)                                           | Primary Source of Income | Supplements Income | (5)                                  | (6)                                            | (7)                                   |
| <b>Household income</b>                                                    |                                 |                                               |                          |                    |                                      |                                                |                                       |
| Less than \$50,000                                                         | 22.69                           | 15.64                                         | 5.45                     | 10.19              | 11.47                                | 10.42                                          | 7.26                                  |
| \$50,000 to \$99,999                                                       | 19.43                           | 12.18                                         | 3.18                     | 9.00               | 8.44                                 | 7.00                                           | 5.60                                  |
| \$100,000 or more                                                          | 18.09                           | 11.11                                         | 2.19                     | 8.92               | 5.70                                 | 5.64                                           | 4.14                                  |
| <b>Financial well-being</b>                                                |                                 |                                               |                          |                    |                                      |                                                |                                       |
| Difficult to get by                                                        | 29.79                           | 24.44                                         | 11.10                    | 13.34              | 18.27                                | 15.06                                          | 8.95                                  |
| Just getting by                                                            | 22.14                           | 16.58                                         | 4.50                     | 12.08              | 11.14                                | 9.70                                           | 7.33                                  |
| Doing okay                                                                 | 20.62                           | 13.31                                         | 3.16                     | 10.16              | 8.51                                 | 7.68                                           | 5.71                                  |
| Living comfortably                                                         | 15.94                           | 7.74                                          | 2.00                     | 5.75               | 4.78                                 | 4.87                                           | 3.85                                  |
| <b>Monthly income changes</b>                                              |                                 |                                               |                          |                    |                                      |                                                |                                       |
| Often varies                                                               | 27.29                           | 20.27                                         | 9.31                     | 10.97              | 16.25                                | 16.17                                          | 9.76                                  |
| Sometimes varies                                                           | 26.37                           | 18.73                                         | 5.36                     | 13.38              | 13.22                                | 12.16                                          | 8.13                                  |
| Roughly the same                                                           | 17.30                           | 10.37                                         | 2.39                     | 7.99               | 6.18                                 | 5.31                                           | 4.43                                  |
| <b>Employment status</b>                                                   |                                 |                                               |                          |                    |                                      |                                                |                                       |
| Full-time employee                                                         | 19.01                           | 12.49                                         | 2.27                     | 10.22              | 7.65                                 | 5.73                                           | 4.91                                  |
| Part-time employee                                                         | 25.92                           | 20.42                                         | 6.38                     | 14.04              | 13.47                                | 13.34                                          | 8.61                                  |
| <i>Part-time preference (2017, N=12,115)</i>                               |                                 |                                               |                          |                    |                                      |                                                |                                       |
| Voluntary part-time                                                        | 24.33                           | 18.30                                         | 3.55                     | 14.75              | 12.96                                | 10.81                                          | 8.35                                  |
| Involuntary part-time                                                      | 32.69                           | 24.29                                         | 9.34                     | 14.96              | 17.47                                | 15.94                                          | 10.32                                 |
| Self-employed or partner                                                   | 34.33                           | 23.98                                         | 8.93                     | 15.05              | 17.47                                | 17.99                                          | 13.52                                 |
| Consultant or contractor                                                   | 33.59                           | 26.74                                         | 7.87                     | 18.87              | 17.18                                | 18.69                                          | 12.39                                 |
| Not employed, looking                                                      | 32.07                           | 24.58                                         | 14.32                    | 10.26              | 18.87                                | 19.49                                          | 11.30                                 |
| Not employed, not looking                                                  | 14.69                           | 7.19                                          | 1.93                     | 5.26               | 4.76                                 | 4.50                                           | 3.15                                  |
| <b>Work schedule status (employees, consultants, contractors, N=8,692)</b> |                                 |                                               |                          |                    |                                      |                                                |                                       |
| Varies at own request                                                      | 25.90                           | 18.52                                         | 4.51                     | 14.00              | 13.48                                | 11.22                                          | 9.87                                  |
| <i>Employer determines</i>                                                 |                                 |                                               |                          |                    |                                      |                                                |                                       |
| Less than 1 week notice                                                    | 28.51                           | 22.20                                         | 5.23                     | 16.97              | 13.23                                | 11.14                                          | 8.13                                  |
| 1 to 2 weeks notice                                                        | 27.05                           | 20.27                                         | 3.94                     | 16.33              | 12.45                                | 11.56                                          | 7.60                                  |
| 3 plus weeks notice                                                        | 21.40                           | 11.22                                         | 2.41                     | 8.81               | 8.50                                 | 4.75                                           | 5.64                                  |
| Normally the same hours                                                    | 18.68                           | 12.59                                         | 2.72                     | 9.87               | 7.74                                 | 6.46                                           | 4.94                                  |

Sources and Notes: Authors' calculations. Data on voluntary part-time and involuntary part-time (those desiring full-time hours) available only for 2017. Questions on work scheduling asked only of those identifying themselves as employees, consultants or

**Appendix Table 2a: Percent with Informal Work, Excluding All Informal Work by Individuals Performing Any Online Tasks, by Reason and Intensity of Use and Demographic Characteristics**

|                    | Any Informal Work in Past Month<br>(1) | Any Informal Work to Earn Money in Last Month<br>(2) | <i>Of which</i>                 |                           | Important Source of Household Income<br>(5) | Usually 10 Percent or More of Household Income<br>(6) | Usually Do 20 or More Hours per Month<br>(7) |
|--------------------|----------------------------------------|------------------------------------------------------|---------------------------------|---------------------------|---------------------------------------------|-------------------------------------------------------|----------------------------------------------|
|                    |                                        |                                                      | Primary Source of Income<br>(3) | Supplements Income<br>(4) |                                             |                                                       |                                              |
| <b>ALL</b>         | 13.11                                  | 7.72                                                 | 2.08                            | 5.64                      | 4.88                                        | 4.65                                                  | 3.48                                         |
| <b>Age (years)</b> |                                        |                                                      |                                 |                           |                                             |                                                       |                                              |

contractors. Tabulations based on SHED data pooled for years 2016 and 2017 and weighted using GfK weights designed to make sample representative of the U.S. population 18 and over. N=18,560 unless otherwise indicated.

|                       |                     |       |       |      |       |       |       |      |
|-----------------------|---------------------|-------|-------|------|-------|-------|-------|------|
|                       | 18-24               | 20.59 | 14.97 | 6.09 | 8.88  | 10.69 | 11.78 | 4.56 |
|                       | 25-34               | 15.49 | 10.39 | 3.38 | 7.01  | 6.56  | 6.83  | 5.05 |
|                       | 35-44               | 12.70 | 7.76  | 1.81 | 5.95  | 4.27  | 3.84  | 3.15 |
|                       | 45-54               | 11.97 | 6.83  | 1.73 | 5.10  | 4.27  | 3.16  | 2.65 |
|                       | 55-64               | 13.16 | 6.99  | 1.44 | 5.55  | 4.42  | 3.92  | 3.50 |
|                       | 65-74               | 9.07  | 3.76  | 0.38 | 3.39  | 2.54  | 2.43  | 2.82 |
|                       | 75 plus             | 8.45  | 2.79  | 0.21 | 2.58  | 1.79  | 1.67  | 1.37 |
| <b>Gender</b>         |                     |       |       |      |       |       |       |      |
|                       | Male                | 12.19 | 7.39  | 2.11 | 5.27  | 5.01  | 4.56  | 3.48 |
|                       | Female              | 13.97 | 8.03  | 2.06 | 5.98  | 4.76  | 4.74  | 3.48 |
| <b>Race/ethnicity</b> |                     |       |       |      |       |       |       |      |
|                       | White               | 12.41 | 7.33  | 1.84 | 5.49  | 4.43  | 3.93  | 3.39 |
|                       | Black               | 14.65 | 10.43 | 3.74 | 6.69  | 6.88  | 8.18  | 5.15 |
|                       | Hispanic            | 10.17 | 5.33  | 1.07 | 4.25  | 2.74  | 2.28  | 1.68 |
|                       | Multiracial         | 17.54 | 13.92 | 3.34 | 10.58 | 9.88  | 6.77  | 6.44 |
|                       | Other               | 15.91 | 7.85  | 2.19 | 5.66  | 5.81  | 5.92  | 3.13 |
| <b>Education</b>      |                     |       |       |      |       |       |       |      |
|                       | High school or less | 15.15 | 9.01  | 3.3  | 5.71  | 6.44  | 5.82  | 3.75 |
|                       | Some college        | 12.64 | 7.70  | 1.83 | 5.87  | 4.78  | 4.82  | 3.77 |
|                       | College plus        | 11.04 | 6.15  | 0.82 | 5.33  | 3.06  | 3.07  | 2.90 |

Sources and Notes: Authors' calculations. Tabulations based on SHED data pooled for years 2016 and 2017 and weighted using GfK weights designed to make sample representative of the U.S. population 18 and over. N=18,560.

**Appendix Table 2b: Percent with Informal Work, Excluding All Informal Work by Individuals Performing Any Online Tasks, by Reason and Intensity of Use and Financial and Job Characteristics**

|                                                                           | Any Informal Work in Past Month<br>(1) | Any Informal Work to Earn Money in Last Month<br>(2) | Of which                        |                           | Important Source of Household Income<br>(5) | Usually 10 Percent or More of Household Income<br>(6) | Usually Do 20 or More Hours per Month<br>(7) |
|---------------------------------------------------------------------------|----------------------------------------|------------------------------------------------------|---------------------------------|---------------------------|---------------------------------------------|-------------------------------------------------------|----------------------------------------------|
|                                                                           |                                        |                                                      | Primary Source of Income<br>(3) | Supplements Income<br>(4) |                                             |                                                       |                                              |
| <b>Household income</b>                                                   |                                        |                                                      |                                 |                           |                                             |                                                       |                                              |
| Less than \$50,000                                                        | 14.65                                  | 9.29                                                 | 3.17                            | 6.12                      | 6.59                                        | 6.15                                                  | 4.50                                         |
| \$50,000 to \$99,999                                                      | 13.26                                  | 7.63                                                 | 1.81                            | 5.82                      | 5.29                                        | 4.61                                                  | 3.43                                         |
| \$100,000 or more                                                         | 11.37                                  | 6.17                                                 | 1.21                            | 4.96                      | 2.71                                        | 3.12                                                  | 2.47                                         |
| <b>Financial well-being</b>                                               |                                        |                                                      |                                 |                           |                                             |                                                       |                                              |
| Difficult to get by                                                       | 18.95                                  | 15.47                                                | 6.67                            | 8.80                      | 11.69                                       | 9.62                                                  | 5.52                                         |
| Just getting by                                                           | 14.31                                  | 9.94                                                 | 2.79                            | 7.14                      | 6.69                                        | 5.77                                                  | 4.49                                         |
| Doing okay                                                                | 13.62                                  | 7.81                                                 | 1.81                            | 6.00                      | 4.70                                        | 4.64                                                  | 3.44                                         |
| Living comfortably                                                        | 10.33                                  | 4.37                                                 | 0.91                            | 3.46                      | 2.37                                        | 2.79                                                  | 2.41                                         |
| <b>Monthly income changes</b>                                             |                                        |                                                      |                                 |                           |                                             |                                                       |                                              |
| Often varies                                                              | 16.41                                  | 11.78                                                | 5.12                            | 6.67                      | 9.19                                        | 9.02                                                  | 5.61                                         |
| Sometimes varies                                                          | 15.79                                  | 10.02                                                | 2.56                            | 7.46                      | 6.47                                        | 6.91                                                  | 4.68                                         |
| Roughly the same                                                          | 11.87                                  | 6.49                                                 | 1.54                            | 4.95                      | 3.83                                        | 3.40                                                  | 2.84                                         |
| <b>Employment status</b>                                                  |                                        |                                                      |                                 |                           |                                             |                                                       |                                              |
| Full-time employee                                                        | 11.72                                  | 6.80                                                 | 1.11                            | 5.69                      | 3.83                                        | 3.12                                                  | 2.75                                         |
| Part-time employee                                                        | 17.09                                  | 13.16                                                | 3.89                            | 9.27                      | 8.56                                        | 8.80                                                  | 5.40                                         |
| <i>Part-time preference (2017, N=12,115)</i>                              |                                        |                                                      |                                 |                           |                                             |                                                       |                                              |
| <i>Voluntary part-time</i>                                                | 16.33                                  | 12.51                                                | 2.08                            | 10.43                     | 10.05                                       | 7.53                                                  | 6.03                                         |
| <i>Involuntary part-time</i>                                              | 23.08                                  | 16.79                                                | 8.54                            | 8.25                      | 11.52                                       | 11.21                                                 | 7.64                                         |
| Self-employed or partner                                                  | 21.56                                  | 14.32                                                | 5.03                            | 9.29                      | 9.45                                        | 10.43                                                 | 7.83                                         |
| Consultant or contractor                                                  | 14.20                                  | 10.17                                                | 2.74                            | 7.44                      | 6.13                                        | 5.42                                                  | 5.14                                         |
| Not employed, looking                                                     | 22.14                                  | 16.23                                                | 9.93                            | 6.30                      | 13.59                                       | 12.84                                                 | 8.01                                         |
| Not employed, not looking                                                 | 10.73                                  | 4.72                                                 | 1.14                            | 3.58                      | 3.02                                        | 3.10                                                  | 2.28                                         |
| <b>Work schedule status (employees, consultants, contractors, N=8692)</b> |                                        |                                                      |                                 |                           |                                             |                                                       |                                              |
| Varies at own request                                                     | 13.76                                  | 8.65                                                 | 1.96                            | 6.69                      | 6.19                                        | 5.15                                                  | 5.22                                         |
| <i>Employer determines</i>                                                |                                        |                                                      |                                 |                           |                                             |                                                       |                                              |
| Less than 1 week notice                                                   | 16.97                                  | 12.44                                                | 3.09                            | 9.35                      | 7.22                                        | 7.36                                                  | 4.76                                         |
| 1 to 2 weeks notice                                                       | 16.21                                  | 13.09                                                | 2.95                            | 10.14                     | 7.91                                        | 5.38                                                  | 4.01                                         |
| 3 plus weeks notice                                                       | 10.68                                  | 4.63                                                 | 0.90                            | 3.73                      | 2.62                                        | 0.99                                                  | 2.58                                         |
| Normally the same hrs                                                     | 11.96                                  | 7.24                                                 | 1.39                            | 5.85                      | 4.17                                        | 3.71                                                  | 2.86                                         |

Sources and Notes: Authors' calculations. Data on voluntary part-time and involuntary part-time (those desiring full-time hours) available only for 2017. Questions on work scheduling asked only of those identifying themselves as employees, consultants or contractors. Tabulations based on SHED data pooled for years 2016 and 2017 and weighted using GfK weights designed to make sample representative of the U.S. population 18 and over. N=18,560 unless otherwise indicated.
